# Supplementary material for: Ionic liquid-assisted hydrothermal synthesis of Bi2WO6–reduced graphene oxide composites with enhanced photocatalytic activity
Source: Royal Society of Chemistry journal article supplement (doi:10.1039/c4ra11276h), 2014-01-01
Supplement: c4ra11276h1.pdf [file c4ra11276h1.pdf]

**Ionic liquid-assisted hydrothermal synthesis of Bi<sub>2</sub>WO<sub>6</sub>-reduced graphene oxide  
composites with enhanced photocatalytic activity**

Hua Lv\*, Yumin Liu, Jiayuan Hu, Zijin Li, Yan Lu

Collaborative Innovation Center of Henan Province for Green Manufacturing of Fine Chemicals,

Key Laboratory of Green Chemical Media and Reactions, Ministry of Education, School of  
Chemistry and Chemical Engineering, Henan Normal University, Xixiang, Henan 453007, P. R.

China

Corresponding author. Fax: +86 373 3326336; E-mail address: [hualv2009@163.com](mailto:hualv2009@163.com).

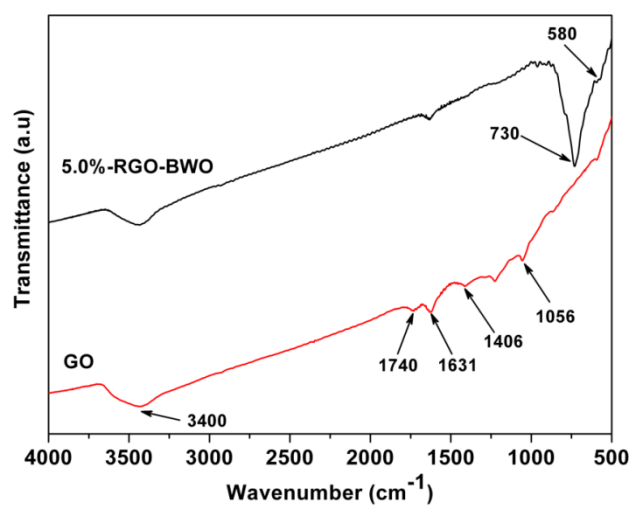

Fig. S1. FT-IR spectra of GO and 5.0%-RGO-BWO samples.

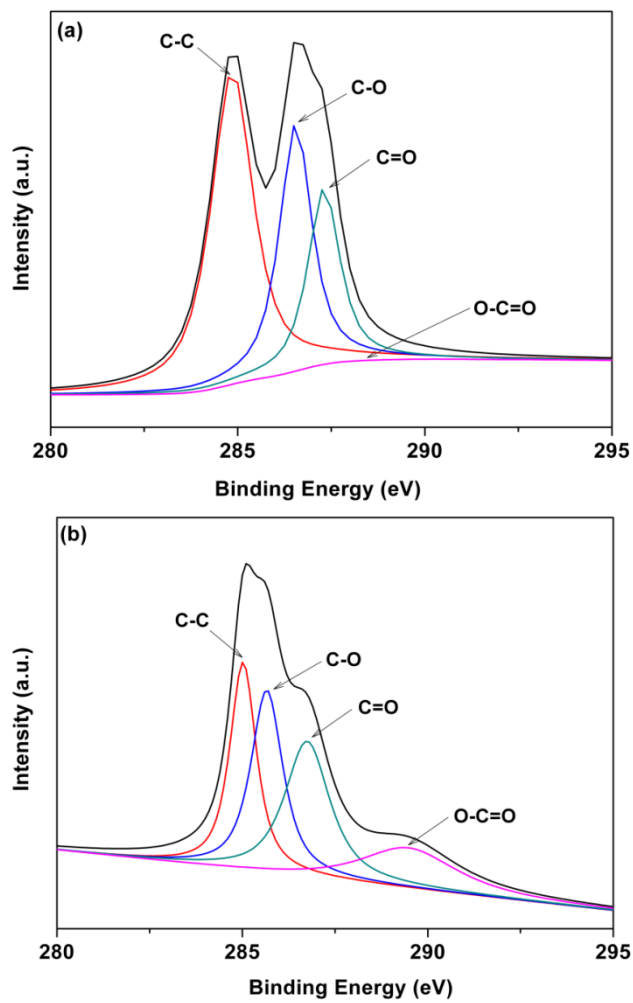

Fig. S2. High-resolution XPS spectra of C1s for GO (a) and 5.0%-RGO-BWO samples.
